# Supplementary material for: Chemotherapy Toxicity in Older Adults Optimized by Geriatric Assessment and Intervention: A Non-Comparative Analysis
Source: MDPI journal article supplement (doi:10.3390/curroncol29090484), 2022-08-26
Supplement: s1 [file s1]

# Supplementary Materials for Chemotherapy Toxicity in Older Adults Optimized by Geriatric Assessment and Intervention: A Non-Comparative Analysis

**Supplementary Table S1:** Geriatric Assessments and interventions

| Domain            | Assessment                                            | Interventions                                                                               |
|-------------------|-------------------------------------------------------|---------------------------------------------------------------------------------------------|
| Cognition         | Mini-Cog +/- MOCA<br>Collateral                       | TFT; B12; Folate; HbA1C<br>Memory Clinic                                                    |
| Mood              | Geriatric Depression Scale                            | Cancer Support House<br>General Practitioner<br>Liaison Psychiatry<br>Psychiatry of Old Age |
| Functional Status | Katz ADL<br>Lawton IADL                               | Physiotherapy<br>Occupational therapy                                                       |
| Mobility          | Falls<br>Timed Up and Go                              | Physiotherapy<br>Occupational therapy                                                       |
| Social Support    | Medical Outcomes Study<br>(MOS) Social Support Survey | Medical social worker<br>Cancer Support House<br>Irish Cancer Society<br>Social Prescribing |
| Nutrition         | Mini Nutritional Assessment<br>Body mass index        | Dietician                                                                                   |
| Polypharmacy      | History<br>General Practitioner<br>Community Pharmacy | Pharmacist assessment:<br>Full drug reconciliation<br>Interaction check<br>Deprescribing    |

Abbreviations: MOCA: Montreal Cognitive Assessment; (I)ADL: (instrumental) activities of daily living.

**Supplementary Table S2.** Toxicity subgroups and CGA deficits.

| <b>Toxicities</b>           | <b>Subsequent Dose Reduction (n = 26)</b> | <b>Dose Delay (n = 52)</b> | <b>Discontinuation Due to Toxicity (n = 39)</b> | <b>Hospitalisation Due to Toxicity (n = 34)</b> |
|-----------------------------|-------------------------------------------|----------------------------|-------------------------------------------------|-------------------------------------------------|
| <b>CGA Variables</b>        | <b>n (%)</b>                              | <b>n (%)</b>               | <b>n (%)</b>                                    | <b>n (%)</b>                                    |
| Timed Up and Go             |                                           |                            |                                                 |                                                 |
| Mean (seconds)              | 11.15                                     | 12.35                      | 11.76                                           | 12.88                                           |
| Median (range)              | 11 (8–17.1)                               | 11.09 (8–31.6)             | 11.43 (8–18.06)                                 | 11.54 (8–31.6)                                  |
| Falls in the last 6 months  |                                           |                            |                                                 |                                                 |
| Yes                         | 4 (15)                                    | 5 (10)                     | 4 (10)                                          | 5 (15)                                          |
| No                          | 22 (85)                                   | 47 (90)                    | 35 (90)                                         | 29 (85)                                         |
| Concomitant meds            |                                           |                            |                                                 |                                                 |
| Mean                        | 6.14                                      | 5.96                       | 5.89                                            | 5.9                                             |
| Median (range)              | 6 (1–14)                                  | 6 (0–16)                   | 6 (1–11)                                        | 6 (1–13)                                        |
| Mini Nutritional Assessment |                                           |                            |                                                 |                                                 |
| 0–7                         |                                           |                            |                                                 |                                                 |
| 8–11                        | 9 (35)                                    | 17 (33)                    | 13 (33)                                         | 12 (35)                                         |
| 12–14                       | 10 (38)                                   | 26 (50)                    | 18 (46)                                         | 17 (50)                                         |
|                             | 7 (27)                                    | 9 (17)                     | 8 (21)                                          | 5 (15)                                          |
| Body mass index             |                                           |                            |                                                 |                                                 |
| Mean                        | 27.29                                     | 26.89                      | 25.54                                           | 25.04                                           |
| Median (range)              | 26.72 (15.43–36.16)                       | 25.97 (15.43–39.25)        | 25.66 (15.43–39.25)                             | 25.21 (15.43–34.14)                             |
| Geriatric depression scale  |                                           |                            |                                                 |                                                 |
| ≤5                          | 21 (81)                                   | 43(83)                     | 33 (85)                                         | 28 (82)                                         |
| >5                          | 5 (19)                                    | 8 (15)                     | 4 (10)                                          | 4 (12)                                          |
| N/A                         | 0 (0)                                     | 1 (2)                      | 2 (5)                                           | 2 (6)                                           |
| Katz ADLs                   |                                           |                            |                                                 |                                                 |
| Mean                        | 5.88                                      | 5.78                       | 5.79                                            | 5.76                                            |
| Median (range)              | 6 (5–6)                                   | 6 (3–6)                    | 6 (4–6)                                         | 6 (4–6)                                         |
| Lawton IADLs                |                                           |                            |                                                 |                                                 |
| Mean                        | 7.52                                      | 7.51                       | 7.5                                             | 7.39                                            |
| Median (range)              | 8 (5–8)                                   | 8 (3–8)                    | 8 (4–8)                                         | 8 (4–8)                                         |
| Charlson Comorbidity Index  |                                           |                            |                                                 |                                                 |
| 0                           |                                           |                            |                                                 |                                                 |
| 1–2                         | 11(42)                                    | 24 (46)                    | 15 (38)                                         | 13 (38)                                         |
| 3–4                         | 10(38)                                    | 19 (37)                    | 16 (41)                                         | 14 (41)                                         |
| ≥5                          | 2(8)                                      | 4 (7)                      | 3 (8)                                           | 3 (9)                                           |
|                             | 3(12)                                     | 5 (10)                     | 5 (13)                                          | 4 (12)                                          |
| * Cognitive impairment      |                                           |                            |                                                 |                                                 |
| Yes                         | 7(27)                                     | 15 (29)                    | 12 (31)                                         | 10 (29)                                         |
| No                          | 17(65)                                    | 31 (60)                    | 22 (56)                                         | 20 (58)                                         |
| N/A                         | 2(8)                                      | 6 (11)                     | 5 (13)                                          | 4 (12)                                          |
| CARG toxicity risk          |                                           |                            |                                                 |                                                 |
| Low                         | 2(8)                                      | 2 (4)                      | 1 (3)                                           | 1 (3)                                           |
| Medium                      | 8(30)                                     | 23 (44)                    | 17 (43)                                         | 13 (38)                                         |
| High                        | 15(58)                                    | 24 (46)                    | 20 (51)                                         | 19 (56)                                         |
| N/A                         | 1(4)                                      | 3 (6)                      | 1 (3)                                           | 1 (3)                                           |

N/A = not available; Activities of Daily Living; Instrumental Activities of Daily Living; Cancer and Aging Research Group. \*cognitive impairment defined as MOCA <26
